# Supplementary material
Source: publisher site journal article supplement (https://www.oncotarget.com/article/28619)
Supplement: Supplementary file 1 [file 28619]

## Addendum: The immunoregulatory protein CD200 as a potentially lucrative yet elusive target for cancer therapy

Anqi Shao<sup>1</sup> and David M. Owens<sup>1,2</sup>

<sup>1</sup>Department of Dermatology, Columbia University Irving Medical Center, Vagelos College of Physicians and Surgeons, New York, NY 10032, USA

<sup>2</sup>Department of Pathology and Cell Biology, Columbia University Irving Medical Center, Vagelos College of Physicians and Surgeons, New York, NY 10032, USA

**Published:**

**Copyright:** © 2024 Shao and Owens. This is an open access article distributed under the terms of the [Creative Commons Attribution License](#) (CC BY 4.0), which permits unrestricted use, distribution, and reproduction in any medium, provided the original author and source are credited.

**This article has an addendum:** This article received a publication fee waiver.

Original article: Oncotarget. 2023; 14:96–103. <https://doi.org/10.18632/oncotarget.28354>
